# Supplementary material for: The Association of Vitamin D with Non-melanoma Skin Cancer Risk: An Umbrella Review of Systematic Reviews and Meta-Analyses
Source: Preprints.org preprint supplement (doi:10.20944/preprints202311.1067.v1), 2023-11-16
Supplement: Supplementary file 1 [file Appendix A (2).docx]

**Pubmed Search String**

("Vitamin D"[MeSH] OR "Vitamin D"[Title/Abstract] OR "Cholecalciferol"[MeSH] OR "Cholecalciferol"[Title/Abstract] OR "Calcitriol"[MeSH] OR "Calcitriol"[Title/Abstract]) AND ("Skin Neoplasms"[MeSH] OR "Skin Neoplasms"[Title/Abstract] OR "Skin Cancer"[Title/Abstract] OR "Non-Melanoma Skin Cancer"[Title/Abstract] OR "Nonmelanoma Skin Cancer"[Title/Abstract] OR "Basal Cell Carcinoma"[MeSH] OR "Basal Cell Carcinoma"[Title/Abstract] OR "Squamous Cell Carcinoma"[MeSH] OR "Squamous Cell Carcinoma"[Title/Abstract]) AND ("systematic review"[Title/Abstract] OR "meta-analysis"[Title/Abstract])
