# Supplementary material for: The Association of Vitamin D with Non-melanoma Skin Cancer Risk: An Umbrella Review of Systematic Reviews and Meta-Analyses
Source: Preprints.org preprint supplement (doi:10.20944/preprints202311.1067.v1), 2023-11-16
Supplement: Supplementary file 5 [file Table S2 (1).docx]

| **Studies→ (SRs)**  **↓**  **(RCTs)** | **Abdelwahab 2022** | **Sutedja 2022** | **Caini 2021** | **Caini 2014** |
| --- | --- | --- | --- | --- |
| **Passarelli 2020** |  | ✓ | ✓ |  |
| **Rosenberg 2016** |  | ✓ |  |  |
| **Brinkhuisen 2016** |  | ✓ |  |  |
| **Tang 2011** | ✓ |  | ✓ | ✓ |
